# Supplementary material for: Development of a new efficient and economical magnetic sorbent silicone surfactant-based activated carbon for the removal of chloro- and nitro-group phenolic compounds from contaminated water samples
Source: Royal Society of Chemistry journal article supplement (doi:10.1039/c9ra07151b), 2019-01-01
Supplement: c9ra07151b1.pdf [file c9ra07151b1.pdf]

### Supplementary data

SD 1: Schematic preparation of a) Magnetic  $\text{Fe}_3\text{O}_4$  particles, b) AC and SS complex, and c)  $\text{Fe}_3\text{O}_4@\text{AC-SS}$ .

SD 2: Summarized FTIR readings.

SD 3: XRD spectra of (a)  $\text{Fe}_3\text{O}_4$  particles, (b)  $\text{Fe}_3\text{O}_4\text{-AC}$ , (c)  $\text{Fe}_3\text{O}_4@\text{AC-SS}$  and (d) AC.

SD 4: TEM images of (a)  $\text{Fe}_3\text{O}_4$  particles, (b)  $\text{Fe}_3\text{O}_4\text{-AC}$ , (c)  $\text{Fe}_3\text{O}_4@\text{AC-SS}$ , (d) AC and their respective cumulative particle distribution graphs.

SD 5: Possible proposed adsorption mechanism for 2,4-DCP and 2,4-DNP towards  $\text{Fe}_3\text{O}_4@\text{AC-SS}$ .

SD 6: Effect of adsorbent dosage on the removal of 2,4-DCP and 2,4-DNP (Condition: pH: 2,4-DCP = 6, 2,4-DNP = 4; contact time: 60 minutes; analyte concentration: 10 mg/L).

SD 7: Effect of initial concentration on the removal of (a) 2,4-DCP and (b) 2,4-DNP (Condition: pH: 2,4-DCP = 6; 2,4-DNP = 4; contact time: 60 minutes; adsorbent dosage: 20 mg).

SD 8: Effect of temperature on the removal of (a) 2,4-DCP and (b) 2,4-DNP (Condition: pH: 2,4-DCP = 6; 2,4-DNP = 4; contact time: 60 minutes; adsorbent dosage: 20 mg).

SD 9: a) Kinetic intraparticle diffusion model and b) external diffusion model of 2,4-DCP and 2,4-DNP.

SD 10: Details of thermodynamic parameters for the adsorption of 2,4-DCP on  $\text{Fe}_3\text{O}_4@\text{AC-SS}$ .

SD 11: Thermodynamic Van Hoff plot for the adsorption of 2,4-DCP and 2,4-DNP on  $\text{Fe}_3\text{O}_4@\text{AC-SS}$ .

SD 12: Reusability cycles for 2,4-DCP and 2,4-DNP.

SD 13: Validation data on the removal study of 2,4-DCP and 2,4-DNP.

a)

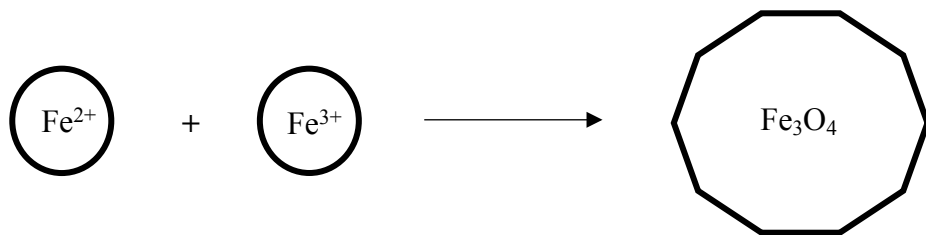

Magnetic  $\text{Fe}_3\text{O}_4$  particle

b)

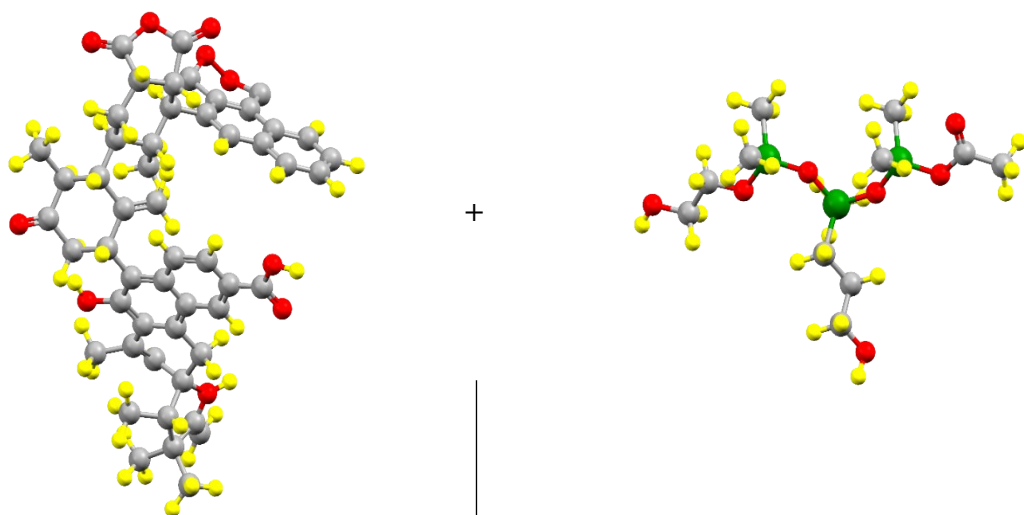

Activated carbon (AC)

Non-ionic silica surfactant OFX 0309  
(SS)

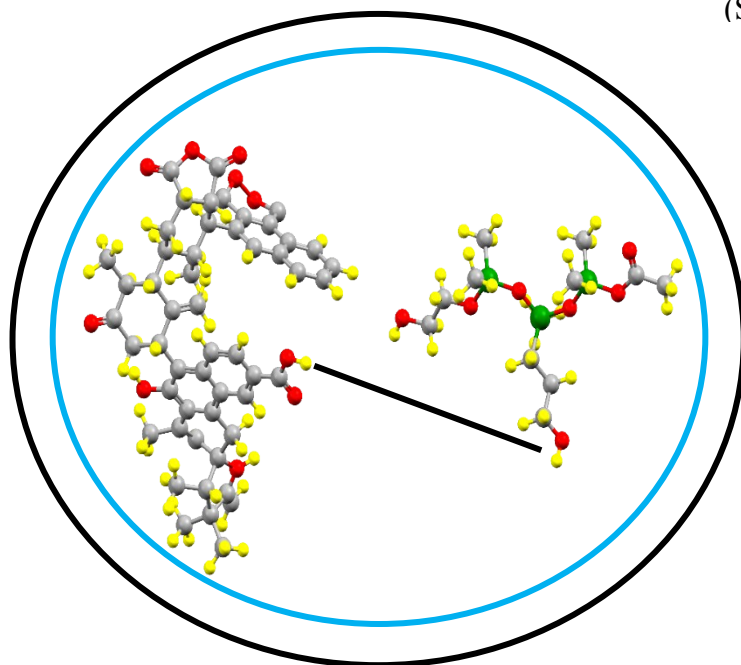

AC-SS complex

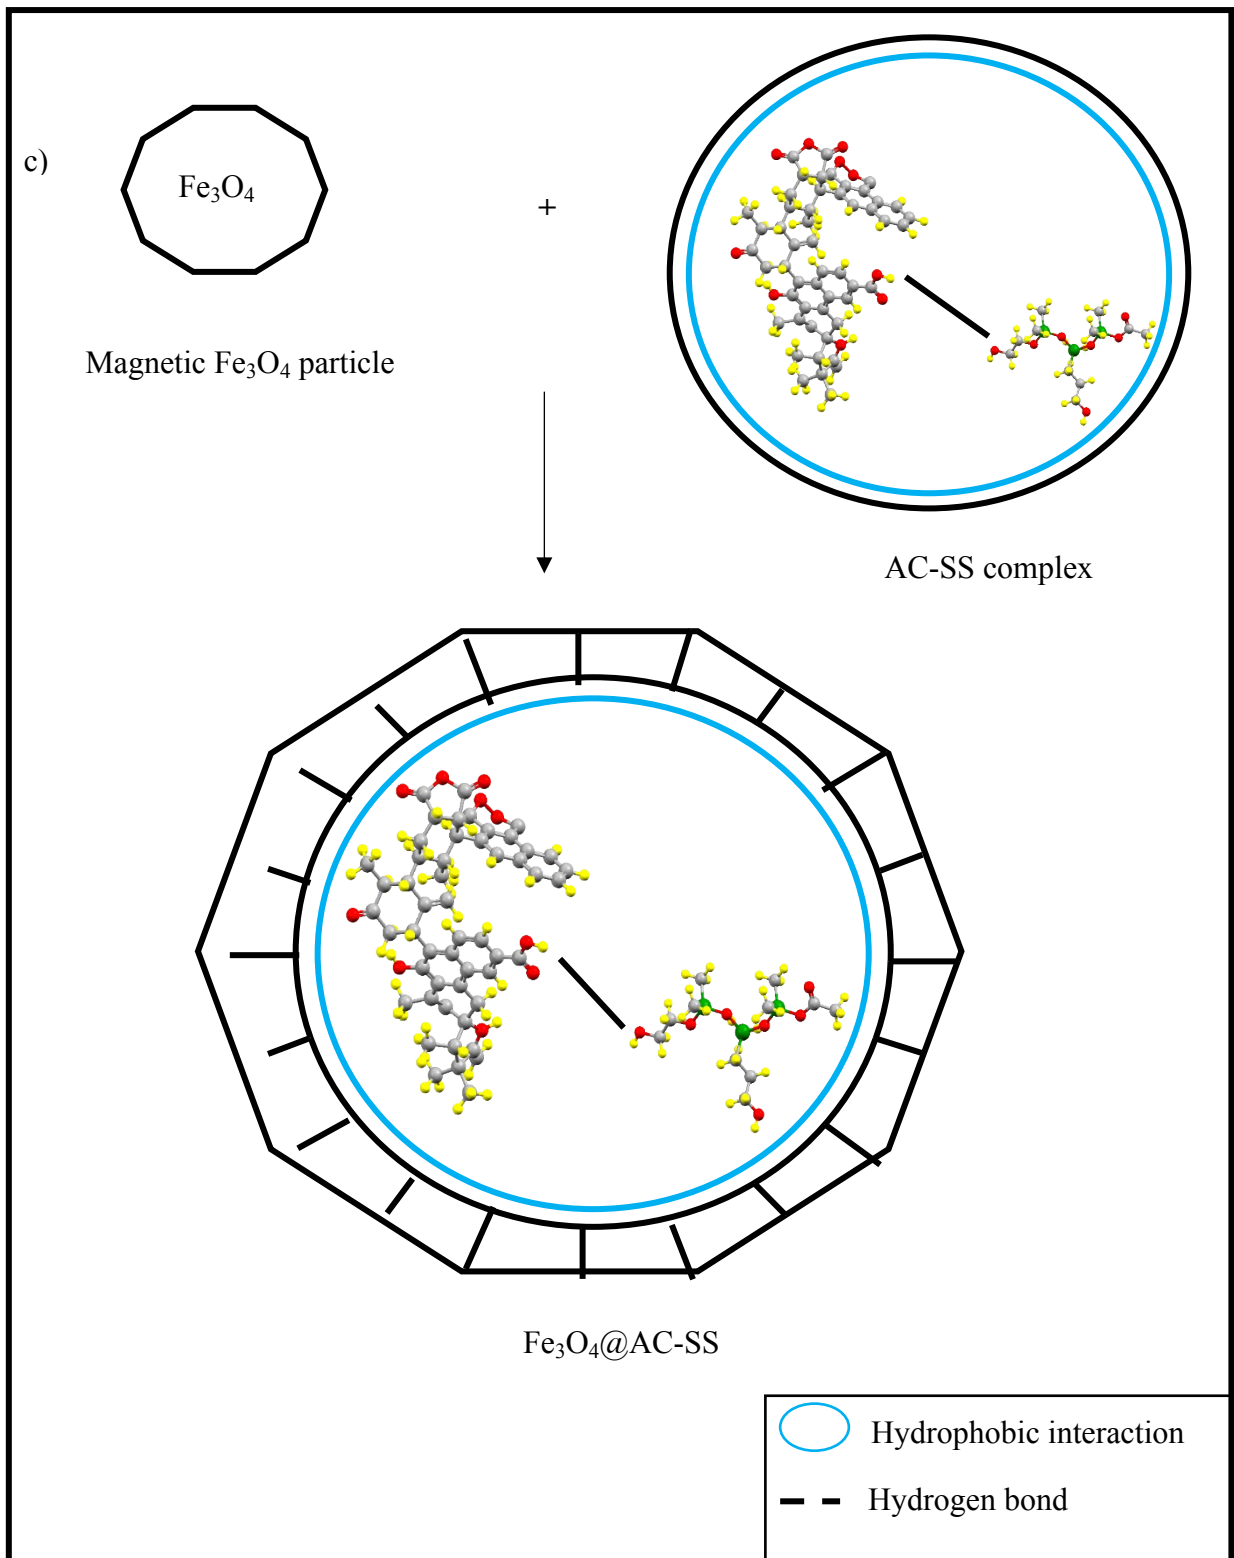

SD 1: Schematic preparation of a) Magnetic  $\text{Fe}_3\text{O}_4$  particles, b) AC and SS complex, and c)  $\text{Fe}_3\text{O}_4@AC\text{-SS}$ .

SD 2: Summarized FTIR readings.

| Characterization                                        | Fe <sub>3</sub> O <sub>4</sub> | Fe <sub>3</sub> O <sub>4</sub> -AC | Fe <sub>3</sub> O <sub>4</sub> @AC-SS | AC   | SS                     |
|---------------------------------------------------------|--------------------------------|------------------------------------|---------------------------------------|------|------------------------|
| <b>a) FTIR (cm<sup>-1</sup>)</b>                        |                                |                                    |                                       |      |                        |
| • OH stretching                                         | 3416                           | 3418                               | 3415                                  | 3419 | -                      |
| • Alkene C=C stretch & H-OH bending                     | 1615                           | 1619                               | 1619                                  | 1618 | -                      |
| • Aromatic C=C bending                                  | -                              | 1406                               | 1405                                  | 1405 | -                      |
| • Fe-O stretching vibration                             | 576                            | 577                                | 579                                   | -    | -                      |
| • -CH and -CH <sub>2</sub> stretching                   | -                              | -                                  | 2981, 2928 & 2862                     | -    | 3000 – 2850            |
| • Symmetric stretching and bending vibration of Si-O-Si | -                              | -                                  | 880, 634 & 578                        | -    | 1200 – 800 & 670 – 450 |
| • Si-O- C vibration                                     | -                              | -                                  | 1048                                  | -    | 1050 – 980             |

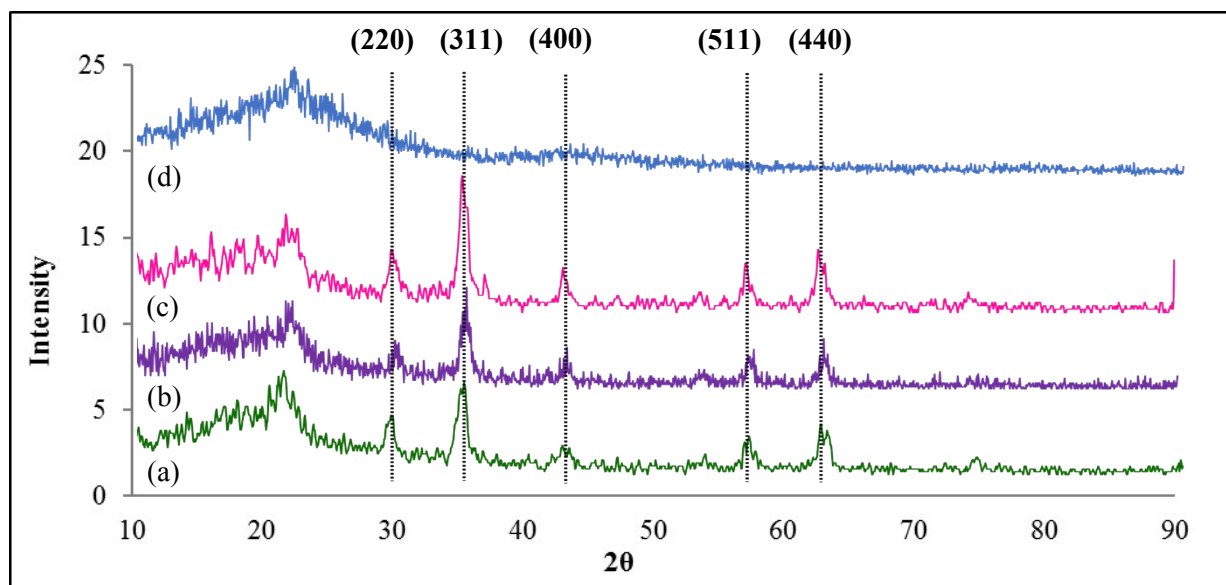

SD 3: XRD spectra of (a) Fe<sub>3</sub>O<sub>4</sub> particles, (b) Fe<sub>3</sub>O<sub>4</sub>-AC, (c) Fe<sub>3</sub>O<sub>4</sub>@AC-SS and (d) AC.

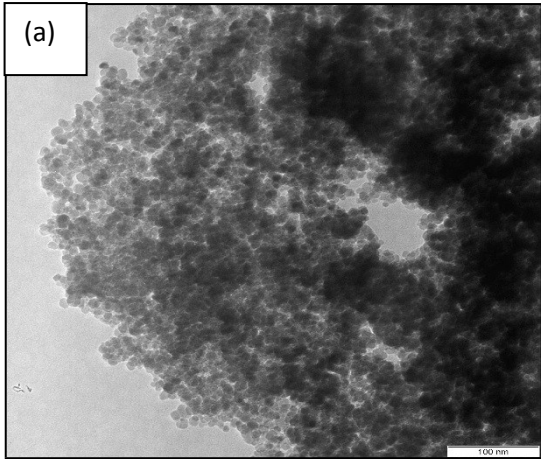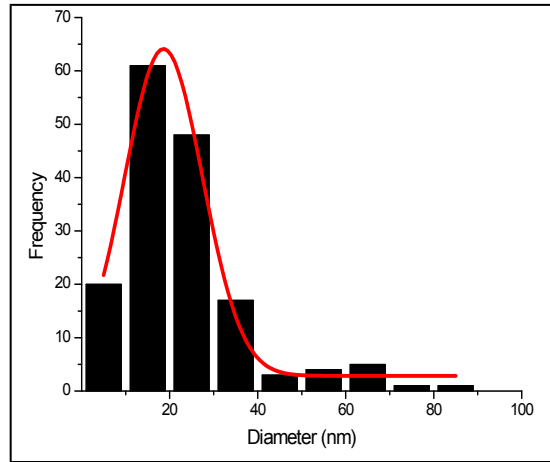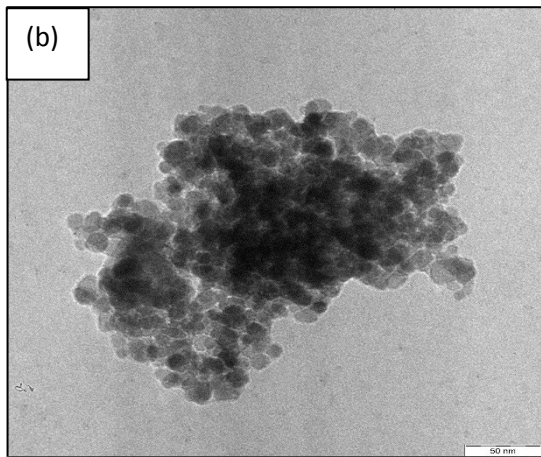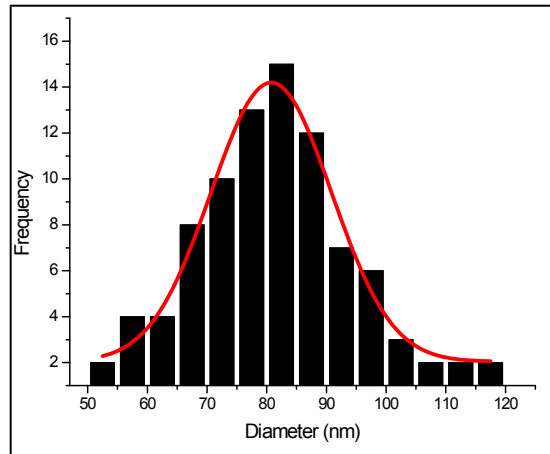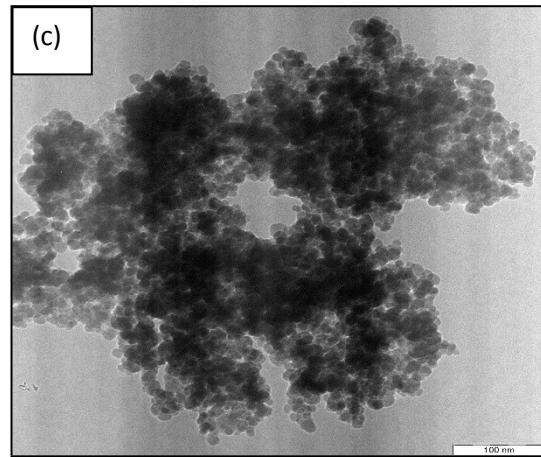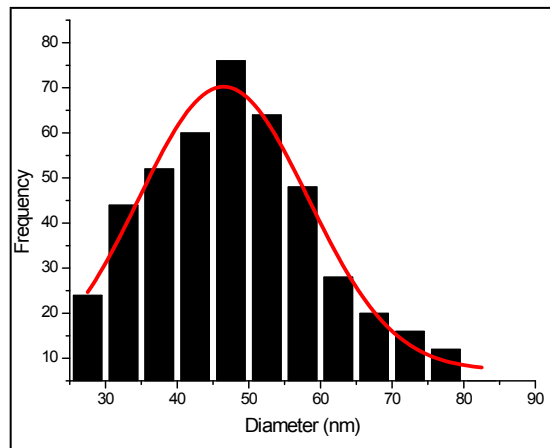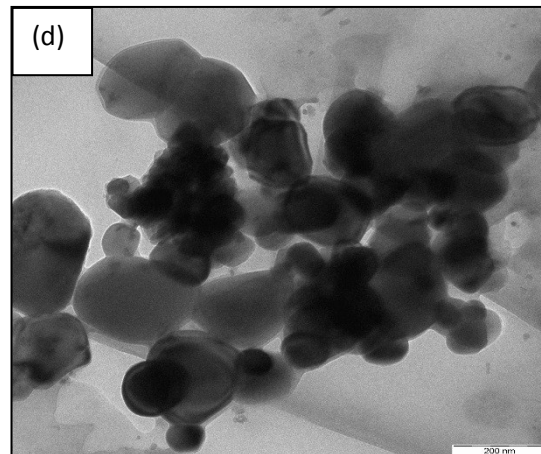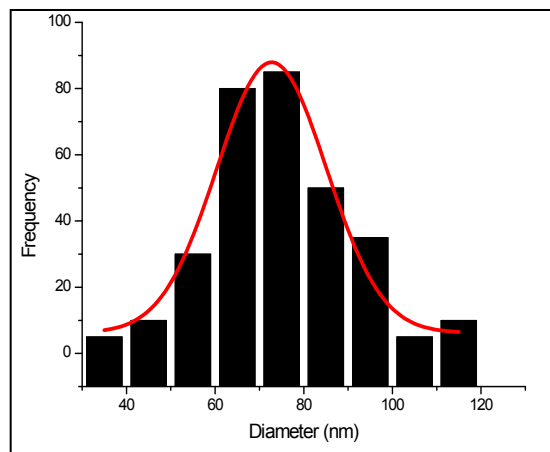

SD 4: TEM images of (a)  $\text{Fe}_3\text{O}_4$  particles, (b)  $\text{Fe}_3\text{O}_4@\text{AC}$ , (c)  $\text{Fe}_3\text{O}_4@\text{AC-SS}$ , (d) AC and their respective cumulative particle distribution graphs.

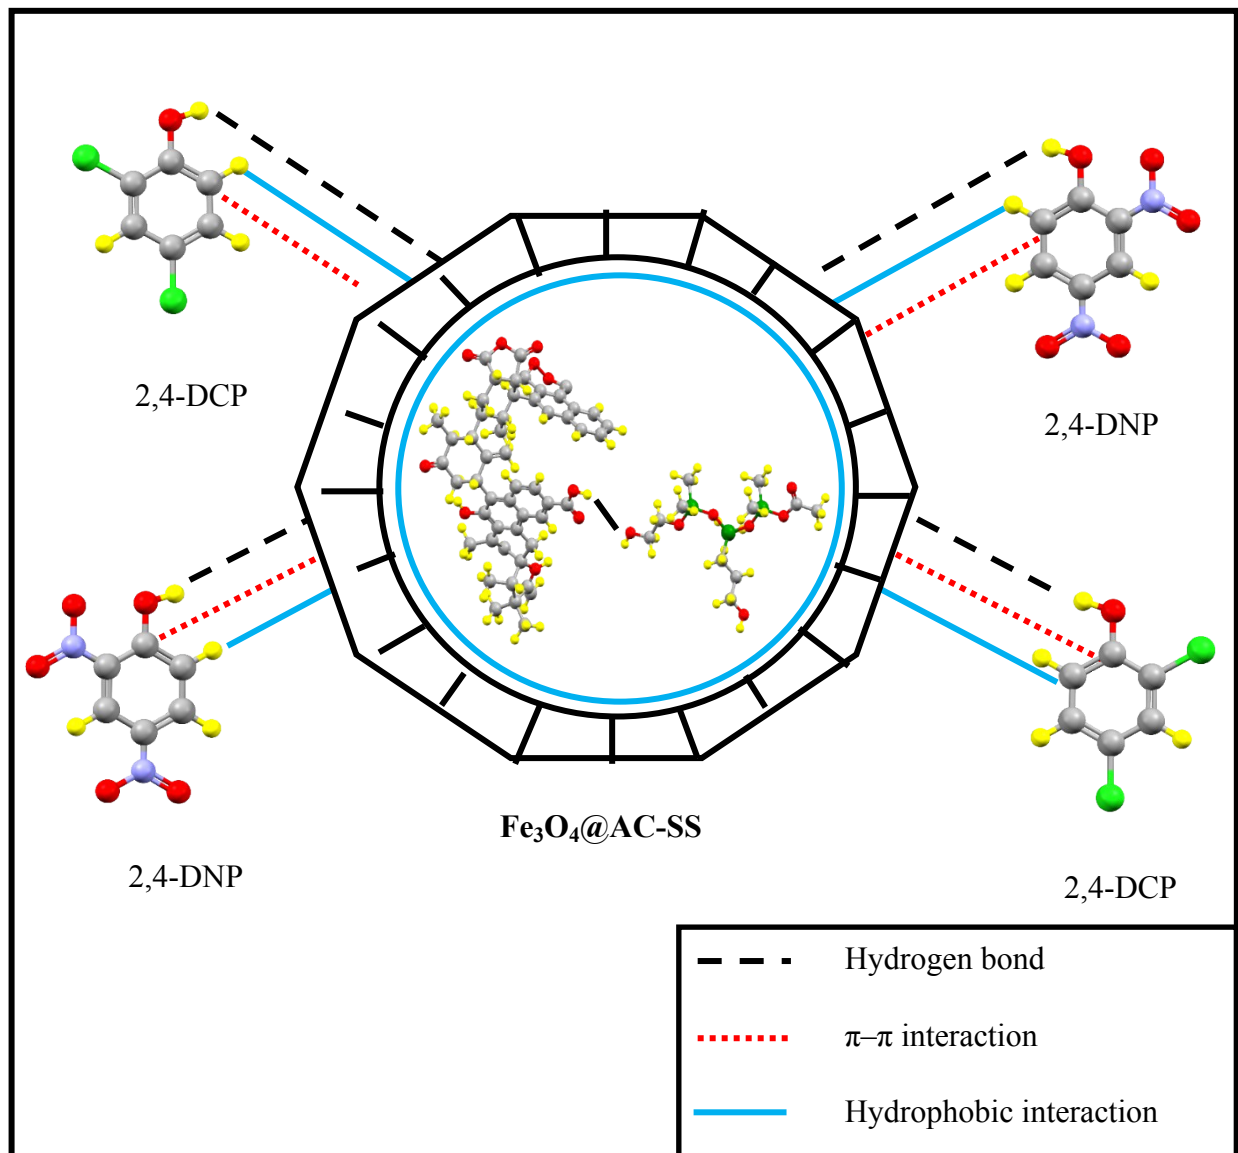

SD 5: Possible proposed adsorption mechanism for 2,4-DCP and 2,4-DNP towards  $\text{Fe}_3\text{O}_4@\text{AC-SS}$ .

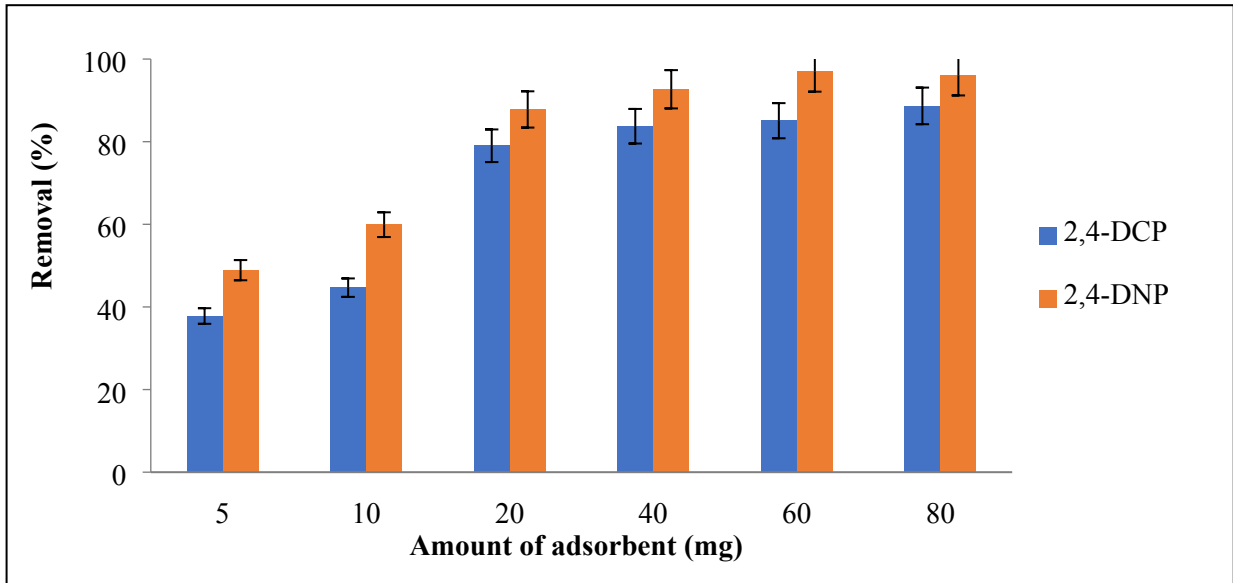

SD 6: Effect of adsorbent dosage on the removal of 2,4-DCP and 2,4-DNP (Condition: pH: 2,4-DCP = 6, 2,4-DNP = 4; contact time: 60 minutes; analyte concentration: 10 mg/L).

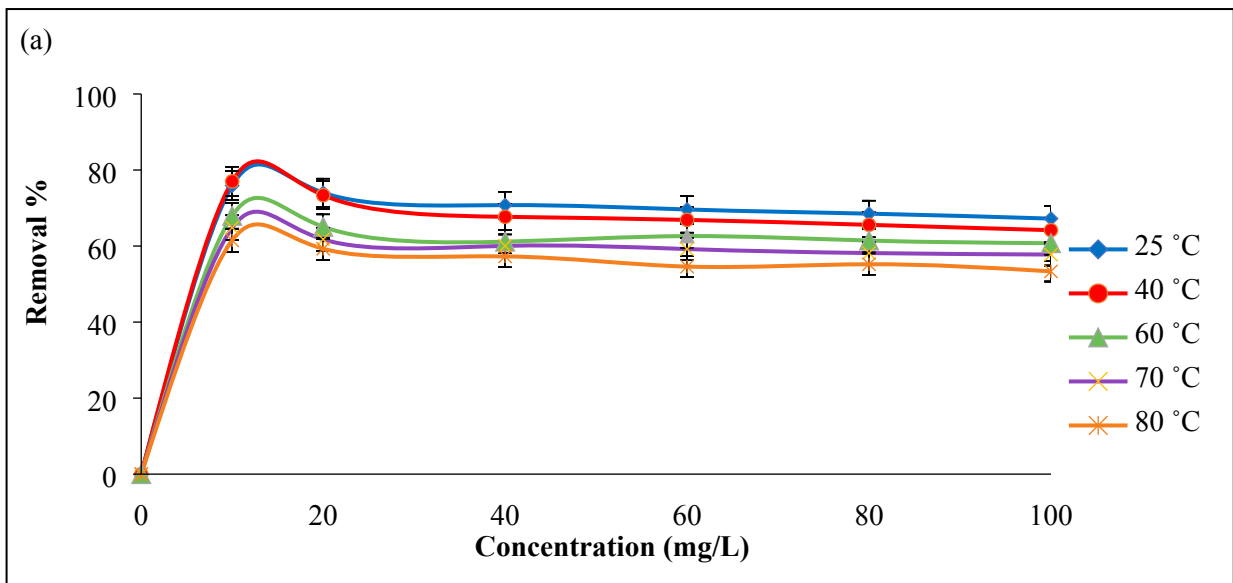

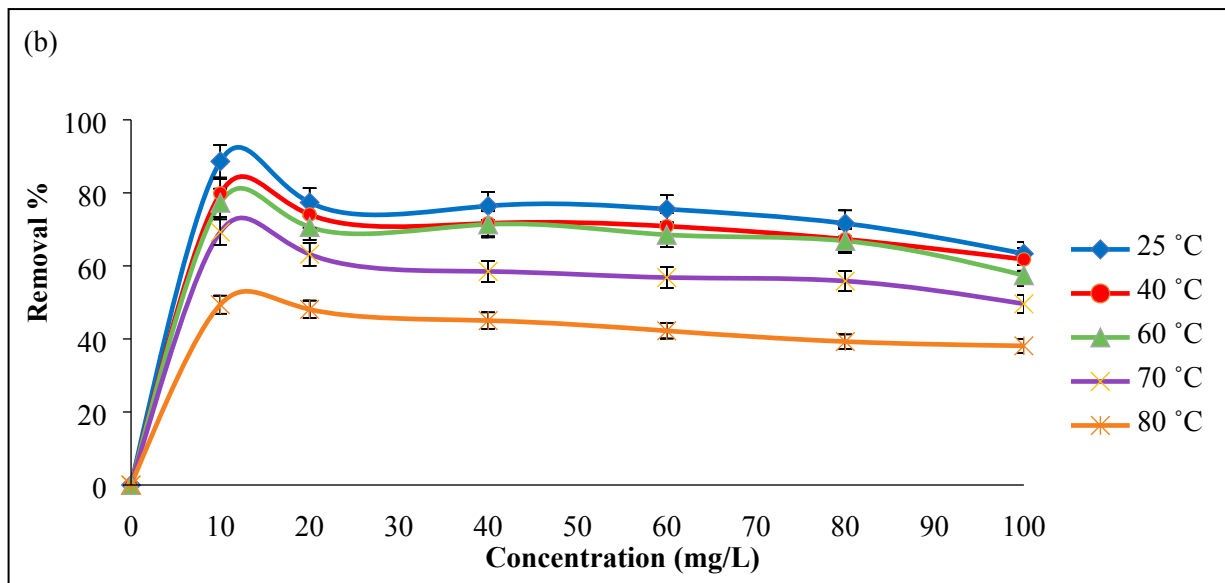

SD 7: Effect of initial concentration on the removal of (a) 2,4-DCP and (b) 2,4-DNP (Condition: pH: 2,4-DCP = 6; 2,4-DNP =4; contact time: 60 minutes; adsorbent dosage: 20 mg).

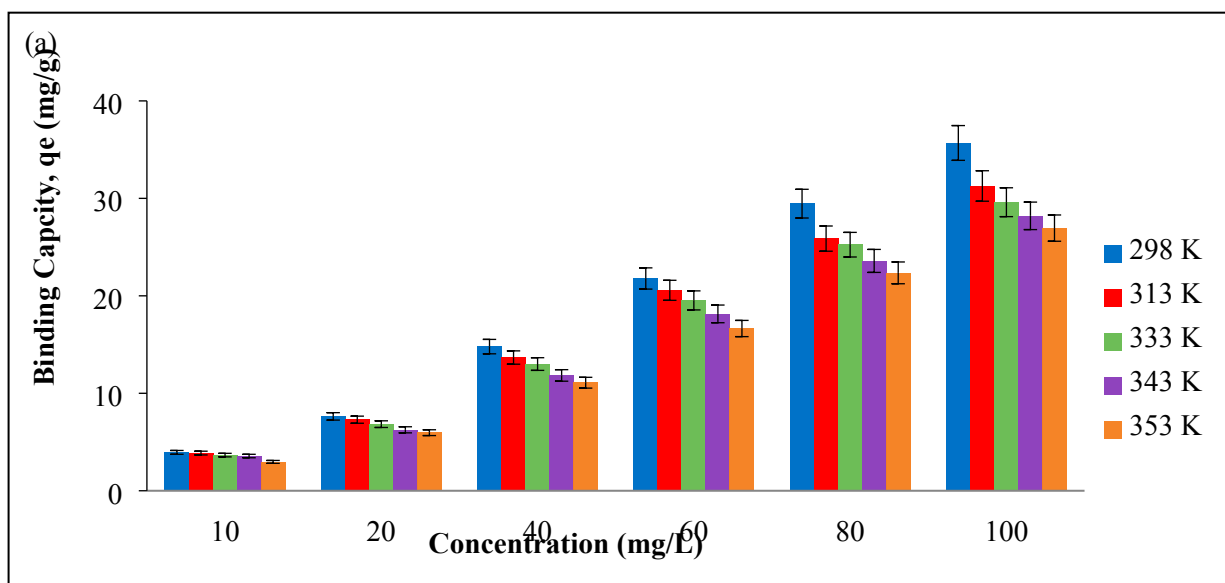



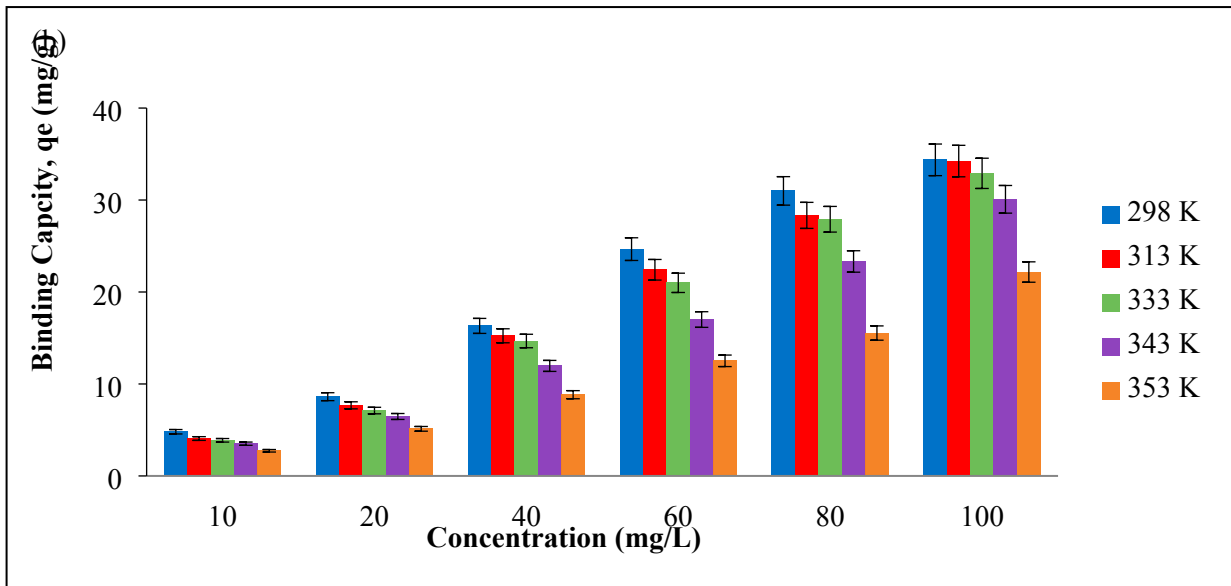

SD 8: Effect of temperature on the removal of (a) 2,4-DCP and (b) 2,4-DNP (Condition: pH: 2,4-DCP = 6; 2,4-DNP = 4; contact time: 60 minutes; adsorbent dosage: 20 mg).

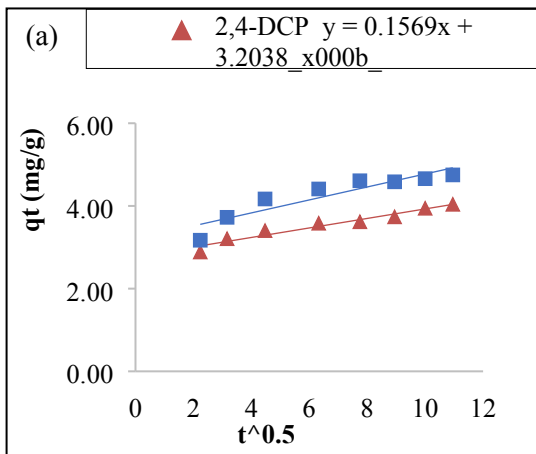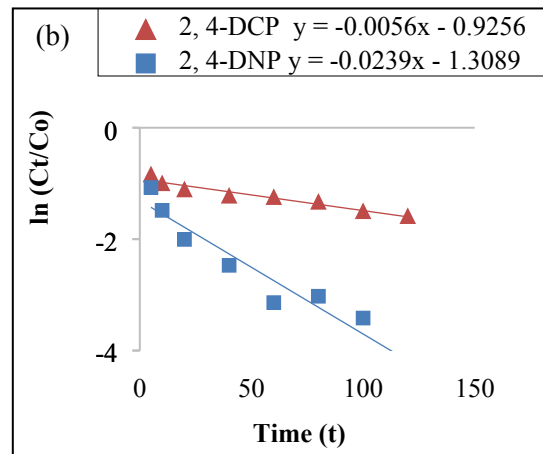

SD 9: (a) Kinetic intraparticle diffusion model and (b) external diffusion model of 2,4-DCP and 2,4-DNP.

SD 10: Details of thermodynamic parameters for the adsorption of 2,4-DCP and 2,4-DNP on Fe<sub>3</sub>O<sub>4</sub>@AC-SS.

| The value of Enthalpy, Entropy, and free Gibbs energy |       |                                     |                                     |                                          |
|-------------------------------------------------------|-------|-------------------------------------|-------------------------------------|------------------------------------------|
| Analyte                                               | T (K) | Enthalpy, $\Delta H^\circ$<br>J/mol | Entropy, $\Delta S^\circ$<br>J/Kmol | Gibbs energy, $\Delta G^\circ$<br>kJ/mol |
| 2,4-DCP                                               | 298   | -9.7091                             | -30.9630                            | -337.3522                                |
|                                                       | 313   |                                     |                                     | -25.0985                                 |
|                                                       | 333   |                                     |                                     | 490.9273                                 |
|                                                       | 343   |                                     |                                     | 914.1347                                 |
|                                                       | 353   |                                     |                                     | 1493.0257                                |
| 2,4-DNP                                               | 298   | -20.1615                            | -62.8829                            | -1078.3492                               |
|                                                       | 313   |                                     |                                     | -509.9129                                |
|                                                       | 333   |                                     |                                     | -234.4607                                |
|                                                       | 343   |                                     |                                     | 1194.8560                                |
|                                                       | 353   |                                     |                                     | 2954.7957                                |

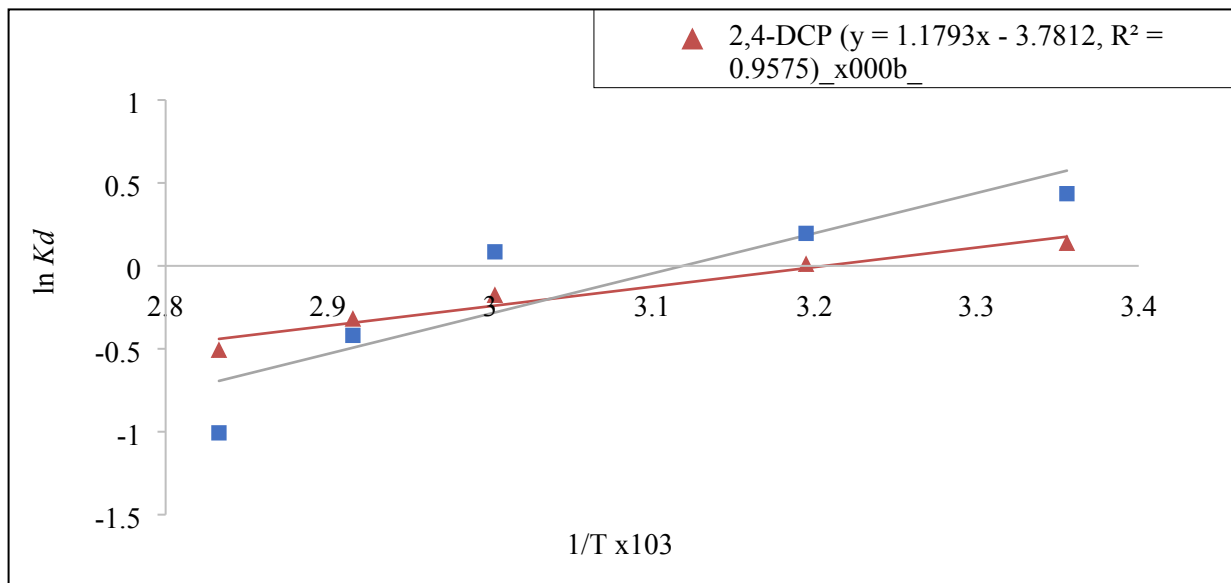

SD 11: Thermodynamic Van't Hoff plot for the adsorption of 2,4-DCP and 2,4-DNP on Fe<sub>3</sub>O<sub>4</sub>@AC-SS.

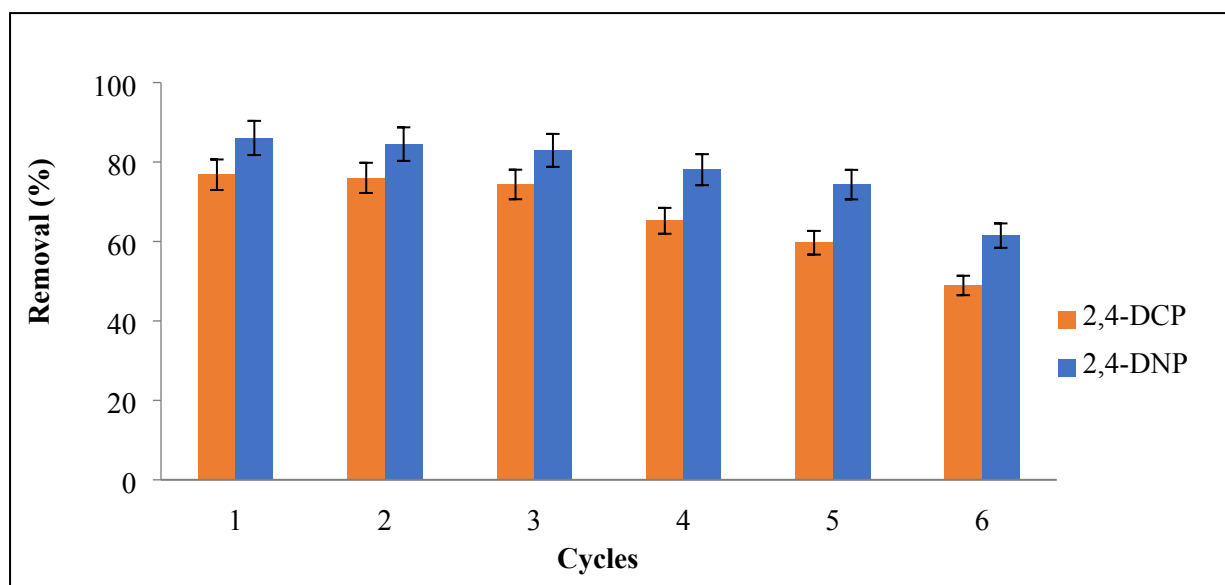

SD 12: Reusability cycles for 2,4-DCP and 2,4-DNP.

SD 13: Validation data on the removal study of 2,4-DCP and 2,4-DNP.

| Analyte | Calibration equation          | R <sup>2</sup> | Spiked concentration (mg/L) | RSD (%)         |                 | Recovery (%) | RSD of recovery (%) |
|---------|-------------------------------|----------------|-----------------------------|-----------------|-----------------|--------------|---------------------|
|         |                               |                |                             | Inter-day (n=7) | Intra-day (n=5) |              |                     |
| 2,4-DCP | $y = 1.038703 \times 10^{-2}$ | 0.9998         | 1                           | 2.05            | 1.65            | 88.33        | 1.28                |
|         |                               |                | 10                          | 0.65            | 4.66            | 79.13        | 1.29                |
|         |                               |                | 40                          | 5.84            | 5.91            | 68.13        | 3.50                |
| 2,4-DNP | $y = 5.009907 \times 10^{-2}$ | 0.9997         | 1                           | 3.58            | 3.70            | 97.22        | 1.43                |
|         |                               |                | 10                          | 2.88            | 2.46            | 84.98        | 1.76                |
|         |                               |                | 40                          | 3.91            | 5.81            | 78.12        | 2.20                |
